# Supplementary material
Source: Elsevier journal article supplement (https://www.sciencedirect.com/science/article/pii/S1885585721001572)
Supplement: mmc1 [file mmc1.pdf]

**MATERIAL ADICIONAL**

**Índice**

I. Revisión sistemática para la identificación de ensayos clínicos sobre eficacia del DAI en prevención primaria ..... 2

    Metodología ..... 2

    Resultados de la revisión sistemática ..... 3

    Figura 1 del material adicional. Proceso de selección de ensayos clínicos ..... 4

    Tabla 1 del material adicional. Características principales de los ECAs sobre DAI incluidos .... 5

    Figura 2 del material adicional. Resultados del metanálisis para cardiopatía isquémica ..... 8

    Bibliografía ..... **¡Error! Marcador no definido.**

II. Evaluación económica ..... 12

    Figura 4 del material adicional. A: Probabilidad mensual de muerte por todas las causas en pacientes con cardiopatía isquémica que reciben DAI más TMC frente a TMC ..... 12

    B: Probabilidad mensual de muerte por todas las causas en pacientes con cardiopatía No Isquémica que reciben DAI más TMC frente a TMC ..... 12

    Figura 5 del material adicional. Curvas de aceptabilidad para DAI más TMC (€/AVAC) ..... 13

    Tabla 2 del material adicional. Tratamiento farmacológico de la cardiopatía isquémica e insuficiencia cardiaca ..... 14

    Tabla 3 del material adicional. Costes unitarios considerados en el modelo de coste-utilidad del DAI ..... 15

## **I. Revisión sistemática para la identificación de ensayos clínicos sobre eficacia del DAI en prevención primaria**

### **Metodología**

Se realizó una actualización de la revisión sistemática de la literatura realizada previamente<sup>1</sup> sobre la eficacia (ensayos clínicos) del DAI en prevención primaria de la muerte súbita cardiaca.

Se elaboró una estrategia de búsqueda para identificar estudios de eficacia y se aplicó en las bases de datos MEDLINE a través de PubMed, EMBASE, Central. Se buscó además en las siguientes bases de datos: Clinicaltrial.gov; Current Controlled Trials; ICTRP (OMS); NHS EED (Economic Evaluation Database); Institute of Health Economics (IHE), GIN, TripDatabase, National Guideline Clearinghouse (guidelines.gov), Australian Clinical Practice Guidelines, ACP on line, CPGinfobase, Centre for Reviews and Dissemination (CRD) databases (Health Technology Assessment, HTA; Database of Abstracts of Reviews of Effectiveness, DARE; Economic Evaluation Database National Health Service, NHSEED; Cochrane Library Plus.

Se restringió la búsqueda por fecha (a partir de diciembre del 2011 y hasta la fecha de acceso: 30 de mayo del 2018).

La selección de ensayos clínicos a partir de títulos y resúmenes y la lectura de artículos y extracción de información se realizó por pares (un cardiólogo o residente de cardiología y un epidemiólogo/metodólogo).

Se incluyeron los estudios con diseño de ensayos clínico aleatorizado (ECA) que comparan DAI con tratamiento médico convencional (TMC).

La población diana fueron adultos con alto riesgo de MSC por:

-Historia de infarto de miocardio previo y taquiarritmia ventricular no sostenida en monitorización con Holter durante 24 horas, o taquiarritmia ventricular inducible en estudio electrofisiológico, o disfunción ventricular izquierda con fracción de eyección <0,35 y clase funcional entre I y III según la New York Heart Association.

-Historia de infarto de miocardio previo y función sistólica del ventrículo izquierda deprimida (fracción de eyección  $\leq 0,35$ )

-Miocardiopatía dilatada no isquémica con función sistólica del ventrículo izquierdo deprimida (fracción de eyección  $\leq 0,35$ )

Se excluyeron los estudios en los que más del 20% de la población eran menores de 20 años y los estudios que analizaban conjuntamente pacientes con indicación de

prevención primaria y secundaria y no presentaban resultados separados para ambos tipos.

La medida de resultado principal fue la mortalidad total (por todas las causas).

Se seleccionaron artículos publicados en inglés o español.

La calidad de la evidencia se valoró empleando la herramienta desarrollada por la Colaboración Cochrane para los ECA, que clasifica el riesgo de sesgo en bajo y alto, o poco claro cuando no se especifican las acciones específicas para minimizar el sesgo.

Se realizaron meta-análisis de la medida de resultado principal, muerte por todas las causas. Se realizaron análisis separados por cardiopatía isquémica y no isquémica.

La medida de síntesis utilizada es el *hazard ratio* (HR) y su intervalo de confianza (IC) del 95%, que es la medida utilizada en la mayoría de ensayos clínicos. Para la estimación de los pesos se utilizaron los métodos estándar de Mantel-Haenszel para el modelo de efectos fijos<sup>2</sup>. Para contrastar la evidencia de heterogeneidad se realizó la prueba de  $\chi^2$  y se obtuvo el estadístico  $I^2$  considerándolo como estadísticamente significativo cuando  $p < 0,05$ .

Se realizaron los metanálisis con el programa Review Manager 5.3. Para estimar el HR y los estadísticos asociados necesarios para los meta-análisis a partir de los diferentes análisis de tiempo al evento se utilizó una plantilla de Excel basada en el trabajo de Tierney y cols<sup>3</sup> y, en caso necesario se digitalizaron las curvas de supervivencia y/o los diagramas de árbol de los estudios individuales mediante el programa GetData Graph Digitizer versión 2.26.0.20.

### Resultados de la revisión sistemática

La búsqueda de ensayos clínicos en bases de datos electrónicas obtuvo 2500 referencias desde enero 2012 hasta 30 de Mayo de 2018 (cifras una vez eliminados duplicados). El proceso de cribado de títulos y resúmenes llevó a la selección de 147 artículos al texto completo (figura 1). La actualización de la búsqueda identificó 5 artículos sobre 4 ensayos clínicos:

- Un nuevo ensayo clínico, el estudio DANISH, realizado en pacientes con miocardiopatía dilatada no isquémica, descrito en un artículo principal<sup>4</sup> y un subanálisis<sup>5</sup>.
- Un nuevo ensayo clínico, el estudio ProICD, realizado en pacientes con cardiopatía isquémica o no isquémica en lista de espera para trasplante cardiaco, descrito en un artículo<sup>6</sup>.

- Un subestudio del ensayo MADIT II ya identificado en el informe previo<sup>7</sup>.
- Un nuevo análisis del ensayo COMPANION<sup>8</sup> que compara CRT-D con CRT-P a diferencia del estudio principal del año 2004 que comparaba ambos grupos con tratamiento médico convencional por lo que no se había incluido en los informes previos.

Se identificaron también 15 artículos en los que se realizaban meta-análisis de ensayos clínicos de DAI en prevención primaria: 13 en cardiopatía no isquémica, uno en cardiopatía isquémica y uno en ambos tipos.

**Figura 1 del material adicional** Proceso de selección de ensayos clínicos

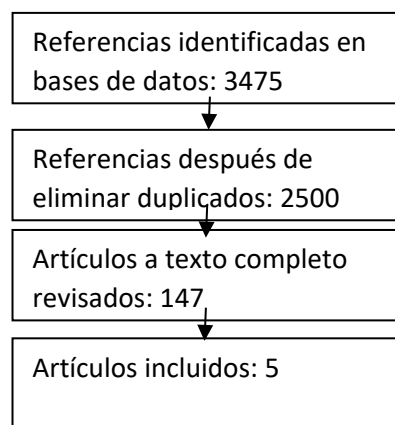

Los nuevos ECA identificados se añadieron a los incluidos en el informe previo, por lo que se incluyeron en la revisión 12 ensayos clínicos publicados entre 1996 y 2018 que comparan DAI con tratamiento farmacológico<sup>9-21</sup> o DAI-CRT con CRT para la prevención primaria de muerte súbita en pacientes con disfunción ventricular por cardiopatía isquémica o no isquémica.

La tabla 1 del material adicional muestra las características principales de los estudios distinguiendo entre cardiopatía isquémica y no isquémica, o ambas. En las figuras 2 y 3 se muestran los resultados del metanálisis para cardiopatía isquémica y no isquémica. Para la estimación de los parámetros del modelo relativos a la eficacia se excluyeron en el metanálisis para el subgrupo de cardiopatía isquémica los ensayos clínicos en los que se implantaba el DAI en pacientes para los que hoy en día no existe la indicación (figura 2B del material adicional). Una vez excluidos, la heterogeneidad entre los estudios mejora considerablemente:  $I^2$  pasa del 62% al 29%.

**Tabla 1 del material adicional. Características principales de los ECA sobre DAI incluidos**

| Estudio                                                                                                                           | País                                                            | Financiación                                         | Grupos que se comparan                          | Años de inclusión, seguimiento medio | Criterios de inclusión                                                                                                                                                                                                          |
|-----------------------------------------------------------------------------------------------------------------------------------|-----------------------------------------------------------------|------------------------------------------------------|-------------------------------------------------|--------------------------------------|---------------------------------------------------------------------------------------------------------------------------------------------------------------------------------------------------------------------------------|
| <b>Cardiopatía isquémica</b>                                                                                                      |                                                                 |                                                      |                                                 |                                      |                                                                                                                                                                                                                                 |
| MADIT Moss 1996 <sup>22</sup>                                                                                                     | EEUU, Italia, Alemania                                          | CPI/Guidant                                          | DAI vs TMC (80% amiodarona)                     | 1990-95<br>27 meses                  | IAM ≥ 3 semanas; episodio de TV asintomática no sostenida. FE ≤ 0,35; NYHA I-III; sin indicación para PCI o CABG en los tres meses previos. TV sostenida inducible en estudio electrofisiológico sin supresión con procainamida |
| CABG-Patch Bigger 1997 <sup>23</sup>                                                                                              | EEUU, Alemania                                                  | CPI/Guidant National Heart, Lung and Blood Institute | DAI vs NO DAI                                   | 1990-97<br>32 meses                  | Programados CABG; FE ≤ 0,35; alteraciones del ECG de señal promedio: QRS > 114 ms                                                                                                                                               |
| MADIT II Moss 2002 <sup>24</sup><br>Goldenberg 2008 <sup>25</sup><br>Goldenberg 2010 <sup>26</sup><br>Bershesht 2011 <sup>7</sup> | EEUU, Europa                                                    | Guidant                                              | DAI vs TMC (amiodarona, antiarrítmicos clase I) | 1996-2001<br>20 meses                | IAM ≥ 1 mes, FE ≤ 0,30                                                                                                                                                                                                          |
| DINAMIT Hohnloser 2004 <sup>27</sup>                                                                                              | Alemania, Canada, Reino Unido, Chequia, EEUU                    | St. Jude                                             | DAI vs No DAI                                   | 1997-2002<br>30 meses                | IAM entre 6 y 40 días previos; FE ≤ 0,35                                                                                                                                                                                        |
| IRIS Steinbeck 2009 <sup>28</sup>                                                                                                 | Alemania, Austria, Chequia, Eslovaquia, Hungría, Polonia, Rusia | Medtronic Bakken Research Center; Astra Zeneca       | DAI vs No DAI                                   | 1999-2007<br>37 meses                | IAM. Criterio 1: FC más de 90 lpm y FE < 41% en los días 5-31 posinfarto. Criterio 2: TV no sostenida (más de 3 complejos con FC > 150lpm) en los días 5-31 postinfarto.                                                        |
| <b>Cardiopatía isquémica y no isquémica</b>                                                                                       |                                                                 |                                                      |                                                 |                                      |                                                                                                                                                                                                                                 |

| Estudio                                                                                        | País            | Financiación                                                                                                               | Grupos que se comparan       | Años de inclusión, seguimiento medio        | Criterios de inclusión                                                                                                                          |
|------------------------------------------------------------------------------------------------|-----------------|----------------------------------------------------------------------------------------------------------------------------|------------------------------|---------------------------------------------|-------------------------------------------------------------------------------------------------------------------------------------------------|
| COMPANION<br>Bristow 2004 <sup>8</sup><br>Anand 2009 <sup>29</sup><br>Britow 2016 <sup>8</sup> | EEUU            | Guidant                                                                                                                    | CRT-DAI vs CRT-P vs No DAI   | 2000-2002<br>14,8, 16,5, 16 meses (mediana) | NYHA III,-IV; QRS ≥ 120 y intervalo PR > 150 ms; FE ≤ 0,35; tratamiento óptimo farmacológico para la insuficiencia cardiaca                     |
| SCD-HeFT<br>Bardy 2005 <sup>30</sup><br>Packer 2009 <sup>31</sup>                              | EEUU,<br>Canada | National Heart, Lung and Blood Institute; National Institute of Health; Wyeth-Ayerst Laboratories; Knoll Pharma; Medtronic | DAI vs amiodarona vs placebo | 1997-2001<br>45,5 meses (mediana)           | Tratados con un vasodilatador; NYHA II-III; FE ≤ 0, 35                                                                                          |
| ProICD<br>Pezawas 2015 <sup>6</sup>                                                            | Austria         | Medtronic Bakken Research Center                                                                                           | DAI vs no DAI                | 2000-2002<br>11,9 años                      | En lista de espera para trasplante; NYHA III-IV; tratamiento farmacológico optimizado durante al menos un mes                                   |
| <b>Cardiopatía no isquémica</b>                                                                |                 |                                                                                                                            |                              |                                             |                                                                                                                                                 |
| CAT<br>Banasch 2002 <sup>32</sup>                                                              | Alemania        | Guidant                                                                                                                    | DAI vs no DAI                | 1991-1997<br>22,8 meses                     | Miocardopatía dilatada sintomática durante 9 meses; FE≤0,30; NYHA II-III                                                                        |
| AMIOVIRT<br>Strikberger 2003 <sup>33</sup>                                                     | EEUU            | Guidant                                                                                                                    | DAI vs amiodarona            | 1996-2000<br>2 años                         | Miocardopatía dilatada; FE ≤ 0,35; TV no sostenida asintomática; NYHA I-III; Tratamiento óptimo con bloqueadores beta, IECA, antialdosterónicos |
| DEFINITE<br>Kadish 2004 <sup>34</sup>                                                          | EEUU            | St. Jude                                                                                                                   | DAI vs no DAI                | 1998-2002<br>29 meses                       | FE<0,36; historia de insuficiencia cardiaca sintomática y TV no sostenida o extrasistólica ventricular frecuente                                |
| DANISH<br>Kober 2016 <sup>4</sup><br>Elming 2017 <sup>5</sup>                                  | Dinamarca       | Medtronic, St. Jude Medical, TrygFonden, and the Danish Heart                                                              | DAI (o CRT-DAI) vs no DAI    | 2008-2014<br>67,6 meses                     | Tratamiento farmacológico óptimo; NYHA II-III (algunos en clase IV programados para CRT); FE ≤0,35;NT-proBNP > 200pg/mL (23.6 pmol/l)           |

| <b>Estudio</b> | <b>País</b> | <b>Financiación</b> | <b>Grupos que se comparan</b> | <b>Años de inclusión, seguimiento medio</b> | <b>Criterios de inclusión</b> |
|----------------|-------------|---------------------|-------------------------------|---------------------------------------------|-------------------------------|
|                |             | Foundation          |                               |                                             |                               |

CABG: *coronary artery by-pass graft*; CRT: *cardiac resynchronization therapy*; DAI: desfibrilador automático implantable; FC: frecuencia cardiaca; FE: fracción de eyección; IAM: infarto agudo de miocardio; LPM: latidos por minuto; NYHA: *New York Heart Association*; PCI: *percutaneous coronary intervention*; TMC: tratamiento médico convencional; TV: taquicardia ventricular

**Figura 2 del material adicional.** Resultados del metanálisis para cardiopatía isquémica

**A. ECA incluidos en la revisión sistemática**

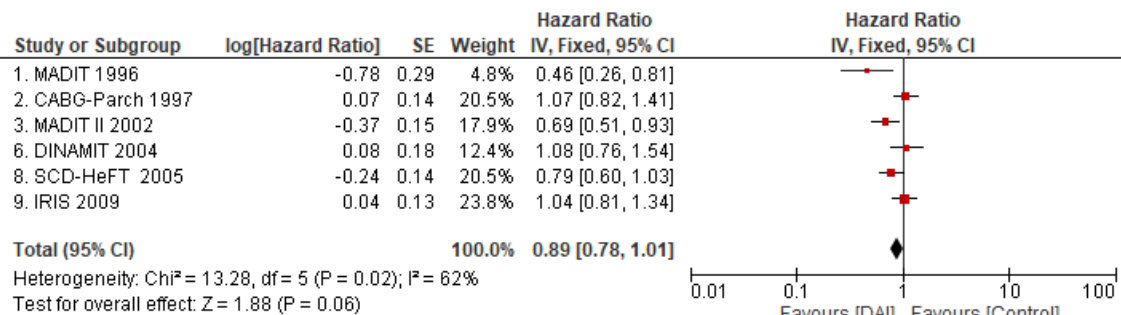

**B. ECA incluidos en el modelo económico**

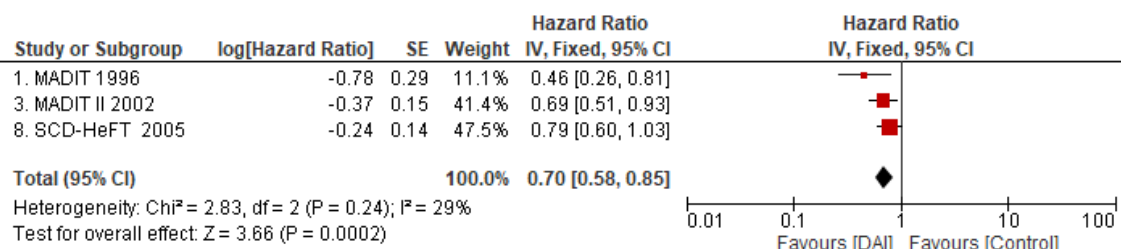

**Figura 3 del material adicional.** Resultados del metanálisis para cardiopatía no isquémica (ECA incluidos en el modelo económico)

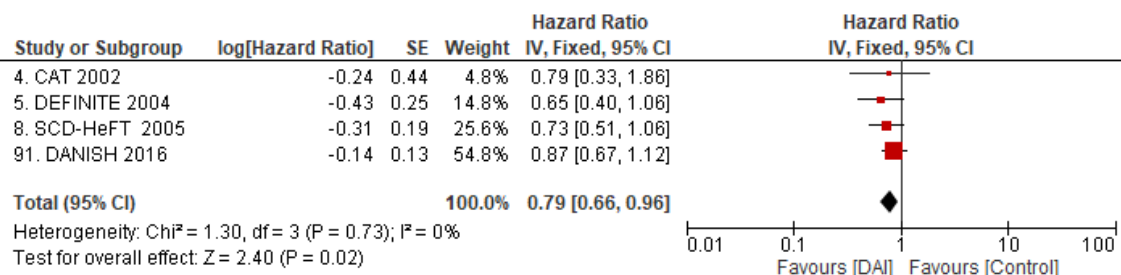

## Bibliografía adicional

1. García Pérez L, Pinilla Domínguez P, García García FJ, García Quintana A, Caballero Dorta E LR. Coste-efectividad del desfibrilador automático implantable en prevención primaria en España. Disponible en <https://www3.gobiernodecanarias.org/sanidad/scs/contenidoGenerico.jsp?idDocumento=5cc0e975-ae0a-11e4-9053-9d1690bb437a&idCarpeta=993a9b1d-7aed-11e4-a62a-758e414b4260l>. Consultado 11 Feb 2019.
2. Cochrane Handbook for Systematic Reviews of Interventions. Disponible en [https://handbook-5-1.cochrane.org/front\\_page.htm](https://handbook-5-1.cochrane.org/front_page.htm). Consultado 11 Feb 2019.
3. Tierney JF, Stewart LA, Ghersi D, Burdett S, Sydes MR. Practical methods for incorporating summary time-to-event data into meta-analysis. *Trials*. 2007;8:16.
4. Køber L, Thune JJ, Nielsen JC, et al. Defibrillator Implantation in Patients with Nonischemic Systolic Heart Failure. *N Engl J Med*. 2016;375:1221-1230.
5. Elming MB, Nielsen JC, Haarlo J, et al. Age and Outcomes of Primary Prevention Implantable Cardioverter-Defibrillators in Patients With Nonischemic Systolic Heart Failure. *Circulation*. 2017;136:1772-1780.
6. Pezawas T, Grimm M, Ristl R, et al. Primary preventive cardioverter-defibrillator implantation (Pro-ICD) in patients awaiting heart transplantation. A prospective, randomized, controlled 12-year follow-up study. *Transpl Int*. 2015;28:34-41.
7. Barsheshet A, Moss AJ, McNitt S, et al. Long-term implications of cumulative right ventricular pacing among patients with an implantable cardioverter-defibrillator. *Heart Rhythm*. 2011;8:212-218.
8. Bristow MR, Saxon LA, Boehmer J, et al. Cardiac-resynchronization therapy with or without an implantable defibrillator in advanced chronic heart failure. *N Engl J Med*. 2004;350:2140-2150.
9. García García MA, Rosero Arenas MA, Ruiz Granell R, Chorro Gascó FJ, Martínez Cornejo A. Usefulness of cardiac resynchronisation therapy devices and implantable cardioverter defibrillators in the treatment of heart failure due to severe systolic dysfunction: systematic review of clinical trials and network meta-analysis. *Heart Asia*. 2016;8:8-15.
10. Woods B, Hawkins N, Mealing S, et al. Individual patient data network meta-analysis of mortality effects of implantable cardiac devices. *Heart*. 2015;101:1800-1806.
11. Katritsis DG, Siontis KC, Bigger JT, et al. Effect of left ventricular ejection fraction and QRS duration on the survival benefit of implantable cardioverter-defibrillators: Meta-analysis of primary prevention trials. *Heart Rhythm*. 2013;10:200-206.
12. Bertoldi EG, Rohde LE, Zimmerman LI, Pimentel M, Polanczyk CA. Cost-effectiveness of cardiac resynchronization therapy in patients with heart failure: the perspective of a middle-income country's public health system. *Int J Cardiol*. 2013;163:309-315.
13. Jiang M, He B, Zhang Q. Comparison of CRT and CRT-D in heart failure: systematic review of controlled trials. *Int J Cardiol*. 2012;158:39-45.

14. Zhang Y, Li K. Use of Implantable Cardioverter Defibrillators in Heart Failure Patients and Risk of Mortality: A Meta-Analysis. *Med Sci Monit.* 2015;21:1792-1797.
15. Hess PL, Al-Khatib SM, Han JY, et al. Survival benefit of the primary prevention implantable cardioverter-defibrillator among older patients: does age matter? An analysis of pooled data from 5 clinical trials. *Circ Cardiovasc Qual Outcomes.* 2015;8:179-186.
16. García-Pérez L, Pinilla-Domínguez P, García-Quintana A, et al. Economic evaluations of implantable cardioverter defibrillators: a systematic review. *Eur J Heal Econ.* 2015;16:879-893.
17. Steinberg BA, Al-Khatib SM, Edwards R, et al. Outcomes of implantable cardioverter-defibrillator use in patients with comorbidities: results from a combined analysis of 4 randomized clinical trials. *JACC Heart Fail.* 2014;2:623-629.
18. Colquitt JL, Mendes D, Clegg AJ, et al. Implantable cardioverter defibrillators for the treatment of arrhythmias and cardiac resynchronisation therapy for the treatment of heart failure: systematic review and economic evaluation. *Health Technol Assess.* 2014;18:1-560.
19. Shah RM, Patel D, Molnar J, Ellenbogen KA, Koneru JN. Cardiac-resynchronization therapy in patients with systolic heart failure and QRS interval  $\geq 130$  ms: insights from a meta-analysis. *Europace.* 2015;17:267-273.
20. Earley A, Persson R, Garlitski AC, Balk EM, Uhlig K. Effectiveness of Implantable Cardioverter Defibrillators for Primary Prevention of Sudden Cardiac Death in Subgroups. *Ann Intern Med.* 2014;160:111-121.
21. Hess PL, Laird A, Edwards R, et al. Survival benefit of primary prevention implantable cardioverter-defibrillator therapy after myocardial infarction: does time to implant matter? A meta-analysis using patient-level data from 4 clinical trials. *Heart Rhythm.* 2013;10:828-835.
22. Moss AJ, Hall WJ, Cannom DS, et al. Improved survival with an implanted defibrillator in patients with coronary disease at high risk for ventricular arrhythmia. Multicenter Automatic Defibrillator Implantation Trial Investigators. *N Engl J Med.* 1996. <http://dx.doi.org/10.1056/NEJM199612263352601>.
23. Bigger JT. Prophylactic Use of Implanted Cardiac Defibrillators in Patients at High Risk for Ventricular Arrhythmias after Coronary-Artery Bypass Graft Surgery. *N Engl J Med.* 1997. <http://dx.doi.org/10.1056/NEJM199711273372201>.
24. Moss AJ, Zareba W, Hall WJ, et al. Prophylactic Implantation of a Defibrillator in Patients with Myocardial Infarction and Reduced Ejection Fraction. *N Engl J Med.* 2002;346:877-883.
25. Goldenberg I, Vyas AK, Hall WJ, et al. Risk Stratification for Primary Implantation of a Cardioverter-Defibrillator in Patients With Ischemic Left Ventricular Dysfunction. *J Am Coll Cardiol.* 2008. <http://dx.doi.org/10.3390/f5081982>.
26. Goldenberg I, Gillespie J, Moss AJ, et al. Long-term benefit of primary prevention with an implantable cardioverter-defibrillator: An extended 8-year follow-up study of the multicenter automatic defibrillator implantation trial II. *Circulation.* 2010. <http://dx.doi.org/10.1161/CIRCULATIONAHA.110.940148>.

27. Hohnloser SH, Kuck KH, Dorian P, et al. Prophylactic Use of an Implantable Cardioverter–Defibrillator after Acute Myocardial Infarction. *N Engl J Med*. 2004. <http://dx.doi.org/10.1056/NEJMoa041489>.
28. Steinbeck G, Andresen D, Seidl K, et al. Defibrillator Implantation Early after Myocardial Infarction. *N Engl J Med*. 2009. <http://dx.doi.org/10.1056/NEJMoa0901889>.
29. Anand IS, Carson P, Galle E, et al. Cardiac resynchronization therapy reduces the risk of hospitalizations in patients with advanced heart failure results from the comparison of medical therapy, pacing and defibrillation in heart failure (COMPANION) trial. *Circulation*. 2009. <http://dx.doi.org/10.1161/CIRCULATIONAHA.108.793273>.
30. Bardy GH, Lee KL, Mark DB, et al. Amiodarone or an Implantable Cardioverter–Defibrillator for Congestive Heart Failure. *N Engl J Med*. 2005. <http://dx.doi.org/10.1056/NEJMoa043399>.
31. Packer DL, Prutkin JM, Hellkamp AS, et al. Impact of Implantable Cardioverter-Defibrillator, Amiodarone, and Placebo on the Mode of Death in Stable Patients With Heart Failure. *Circulation*. 2009;120:2170-2176.
32. Bänsch D, Antz M, Boczor; S, et al. Primary prevention of sudden cardiac death in idiopathic dilated cardiomyopathy: The Cardiomyopathy Trial (CAT). *Circulation*. 2002. <http://dx.doi.org/10.1161/01.CIR.0000012350.99718.AD>.
33. Strickberger SA, Hummel JD, Bartlett TG, et al. Amiodarone versus implantable cardioverter-defibrillator: Randomized trial in patients with nonischemic dilated cardiomyopathy and asymptomatic nonsustained ventricular tachycardia - AMIOVIRT. *J Am Coll Cardiol*. 2003. [http://dx.doi.org/10.1016/S0735-1097\(03\)00297-3](http://dx.doi.org/10.1016/S0735-1097(03)00297-3).
34. Kadish A, Dyer A, Daubert JP, et al. Prophylactic Defibrillator Implantation in Patients with Nonischemic Dilated Cardiomyopathy. *N Engl J Med*. 2004. <http://dx.doi.org/10.1056/NEJMoa033088>.

## II. Evaluación económica

Figura 4 del material adicional

A. Probabilidad mensual de muerte por todas las causas en pacientes con Cardiopatía Isquémica que reciben DAI más TMC frente a TMC

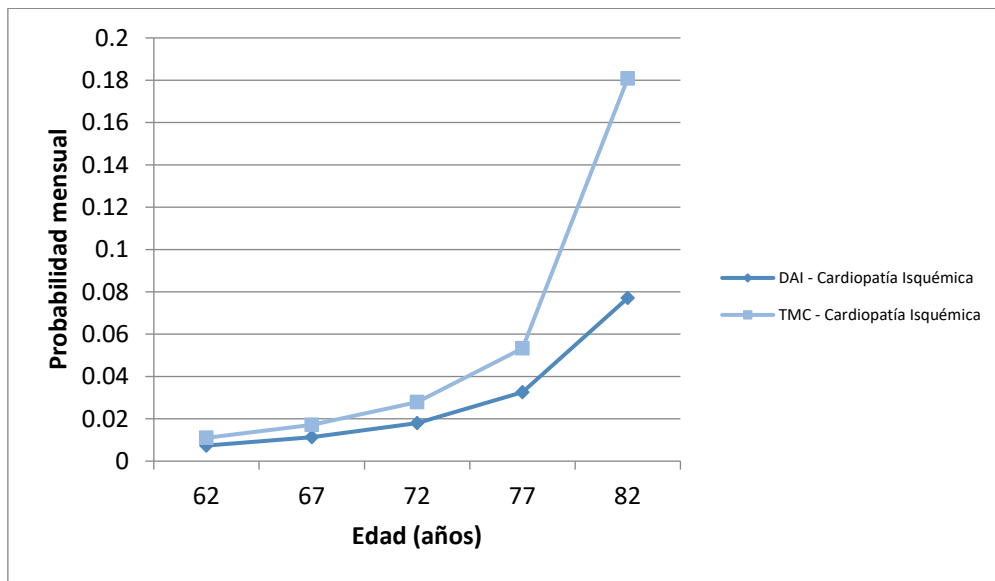

B. Probabilidad mensual de muerte por todas las causas en pacientes con Cardiopatía No Isquémica que reciben DAI más TMC frente a TMC

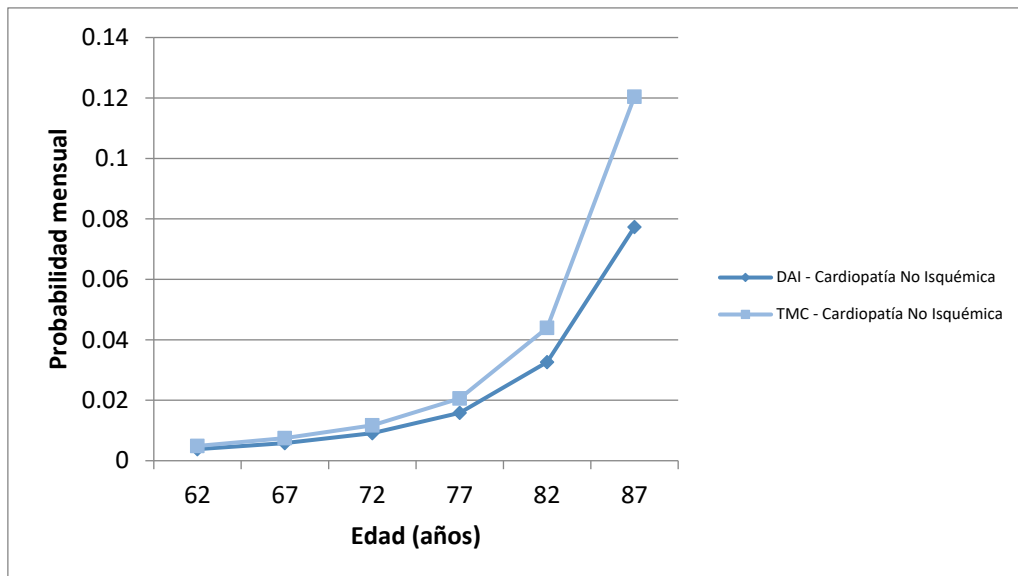

Figura 5 del material adicional. Curvas de aceptabilidad para DAI más TMC (€/AVAC)

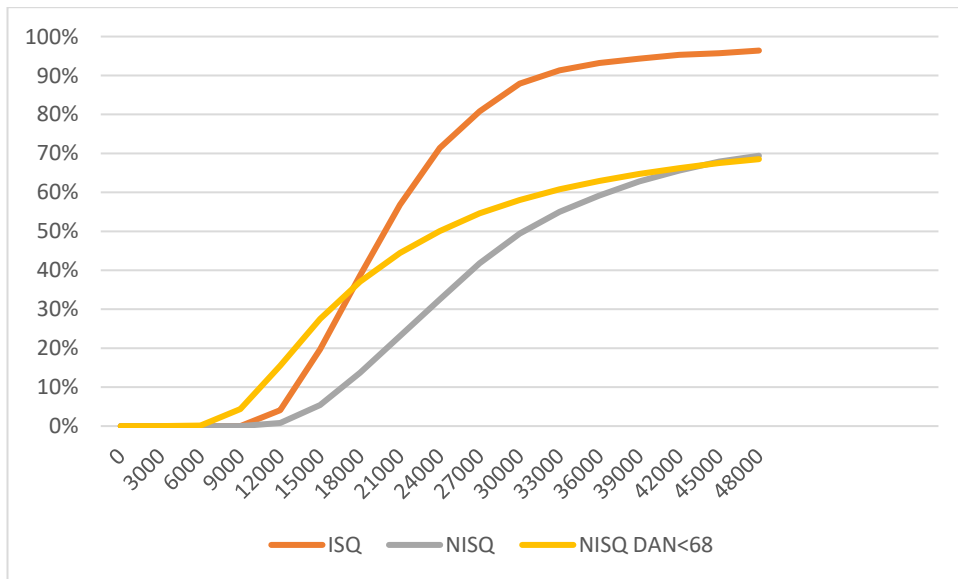

ISQ: isquémicos; NISQ: no isquémicos; DAN < 68: población DANISH menores de 68 años.

**Tabla 2 del material adicional. Tratamiento farmacológico de la cardiopatía isquémica e insuficiencia cardiaca**

| Grupo                             | % de uso | Medicamento y dosis (mg/día)                             | Coste unitario |
|-----------------------------------|----------|----------------------------------------------------------|----------------|
| Bloqueadores beta                 | 80       | CARVEDILOL (50) O BISOPROLOL (10)                        | 6,14€          |
| IECA                              | 80       | ENALAPRIL BELMAC EFG (40)<br>VALSARTAN ALTER EFG (160) O | 2,58€<br>3,04€ |
| ARA II                            | 20       | LOSARTAN (100) O CADENSARTAN (32)                        |                |
| Diuréticos de asa                 | 80       | FUROSEMIDA APOTEX EFG (40)                               | 1,8€           |
| Diuréticos ahorradores de potasio | 80       | ESPIRONOLACTONA ALTER EFG (25) y<br>EPLERENONA (25)      | 1,2€           |
| Digitálicos                       | 15       | DIGOXINA KERN PHARMA (0,25)                              | 0,225€         |
| Estatinas                         | 80       | ATORVASTATINA ABEX EFG (20)                              | 14,736€        |
| Antiagregantes                    | 100      | Ac. ACETISLAICILICO 100 (100)                            | 1,45€          |
| Antiarrítmicos                    | 15       | AMIODARONA (200)                                         | 0,522€         |

**Tabla 3 del material adicional. Costes unitarios considerados en el modelo de coste-utilidad del DAI**

| Concepto                      | Supuesto                                         | Coste<br>(€ 2.018) | Observaciones                                                                           |
|-------------------------------|--------------------------------------------------|--------------------|-----------------------------------------------------------------------------------------|
| <b>Intervención</b>           |                                                  |                    |                                                                                         |
| Implantación del DAI          | Estancia en hospital de día                      | 266,65             | Contabilidad analítica                                                                  |
|                               | Ingreso hospitalario (1 día)                     | 616,56             | Contabilidad analítica                                                                  |
|                               | Generador                                        | 10.764             | Coste unitario                                                                          |
|                               | Electrodo                                        | 476,67             | Coste unitario                                                                          |
|                               | Intervención en laboratorio de electrofisiología | 606,42             | Contabilidad analítica                                                                  |
|                               | Tratamiento antibiótico profiláctico             | 1,9                | Cefuroxima 1,5g iv (unidosis)                                                           |
| Recambio del generador        | Estancia en hospital de día                      | 266,65             | Contabilidad analítica                                                                  |
|                               | Ingreso hospitalario (1 día)                     | 616,56             | Contabilidad analítica                                                                  |
|                               | Generador                                        | 10.764             | Coste unitario                                                                          |
|                               | Tratamiento antibiótico profiláctico             | 1,9                | Cefuroxima 1,5g iv (unidosis)                                                           |
| Seguimiento                   | Dos visitas anuales (1 cardiólogo + 1 enfermera) | 78                 | Suma de los costes unitarios aportados por el Servicio Canario de Salud (Costes, 2018)  |
| <b>Complicaciones del DAI</b> |                                                  |                    |                                                                                         |
| <b>Perioperatorias</b>        |                                                  |                    |                                                                                         |
| Infección superficial         | Tratamiento antibiótico                          | 201,6              | vancomicina iv 1g/12h durante 2 semanas                                                 |
|                               | Ingreso 2 semanas                                | 8.631,84           | Contabilidad analítica                                                                  |
|                               | Extracción en quirófano                          | 7.308,18           | Contabilidad analítica                                                                  |
|                               | Generador                                        | 10.764             | Coste unitario                                                                          |
|                               | Electrodo                                        | 476,67             | Coste unitario                                                                          |
| Infección profunda            | Tratamiento antibiótico                          | 180 – 4.494        | Cloxacil.lina iv 2g/4h durante 4-6 semanas, ó<br>Daptomicina iv 850mg/24h durante 4 - 6 |

|                         |                                                            |                       |                                   |
|-------------------------|------------------------------------------------------------|-----------------------|-----------------------------------|
|                         | Ingreso 4-6 semanas                                        | 17.263,68 –<br>25.896 | semanas<br>Contabilidad analítica |
|                         | Extracción en quirófano                                    | 4.308,18              | Contabilidad analítica            |
|                         | Generador                                                  | 10.764                | Coste unitario INOGEN             |
|                         | Electrodo                                                  | 476,67                | Coste unitario                    |
| Hemorragia mayor        | Dos semanas de ingreso en planta                           | 8.631,84              | Contabilidad analítica            |
|                         | Limpieza quirúrgica                                        | 4.308,18              | Contabilidad analítica            |
| Neumotórax              | Una semana de ingreso en planta                            | 4.315,92              | Contabilidad analítica            |
| <b>Seguimiento</b>      |                                                            |                       |                                   |
| Terapia inadecuada      | Atención a urgencias o hospital de día para reprogramación | 2.008,16              | Contabilidad analítica            |
| Rotura o desplazamiento | 5 días de hospitalización                                  | 3.082,8               | Contabilidad analítica            |
|                         | Electrodo                                                  | 476,67                | Coste unitario                    |
|                         | Intervención en quirófano                                  | 606,42                | Contabilidad analítica            |
|                         | Tratamiento antibiótico profiláctico                       | 1,9                   | Cefuroxima 1,5g iv (unidosis)     |
| Discontinuación         | 1 día de hospitalización                                   | 616,56                | Contabilidad analítica            |
|                         | Extracción en quirófano                                    | 4.308,18              | Contabilidad analítica            |
| <b>Ingreso por IC</b>   | Estancia 7 días                                            | 4.315,92              | Contabilidad analítica            |

DAI: desfibrilador automático implantable; IC: insuficiencia cardiaca. La contabilidad analítica corresponde al Hospital Vall D'Hebron
